# Supplementary material for: PPARβ/δ priming enhances the anti-apoptotic and therapeutic properties of mesenchymal stromal cells in myocardial ischemia–reperfusion injury
Source: PubMed Central journal article supplement (PMC9034535; doi:10.1186/s13287-022-02840-0), 2022-04-23
Supplement: 13287_2022_2840_MOESM1_ESM.pdf [file 13287_2022_2840_MOESM1_ESM.pdf]

## **Additional File 1**

PPAR $\beta/\delta$  priming enhances the anti-apoptotic and therapeutic properties of mesenchymal stromal cells in myocardial ischemia-reperfusion injury

*By*

Charlotte Sarre<sup>1,2§</sup>, Rafael Contreras-Lopez<sup>1,2§</sup>, Nitirut Nerpermpisooth<sup>3</sup>, Christian Barrere<sup>1</sup>, Sarah Bahraoui<sup>2</sup>, Claudia Terraza<sup>2</sup>, Gautier Tejedor<sup>2</sup>, Anne Vincent<sup>1</sup>, Patricia Luz-Crawford<sup>4,5</sup>, Kantapich Kongpol<sup>1,3</sup>, Sarawut Kumphune<sup>6</sup>, Christophe Piot<sup>1,7</sup>, Joel Nargeot<sup>1</sup>, Christian Jorgensen<sup>2,8</sup>, Farida Djouad<sup>2,#</sup>, Stéphanie Barrere-Lemaire<sup>1,#</sup>

§ Equally contributing first authors; # Equally contributing corresponding authors

## Supplementary figures

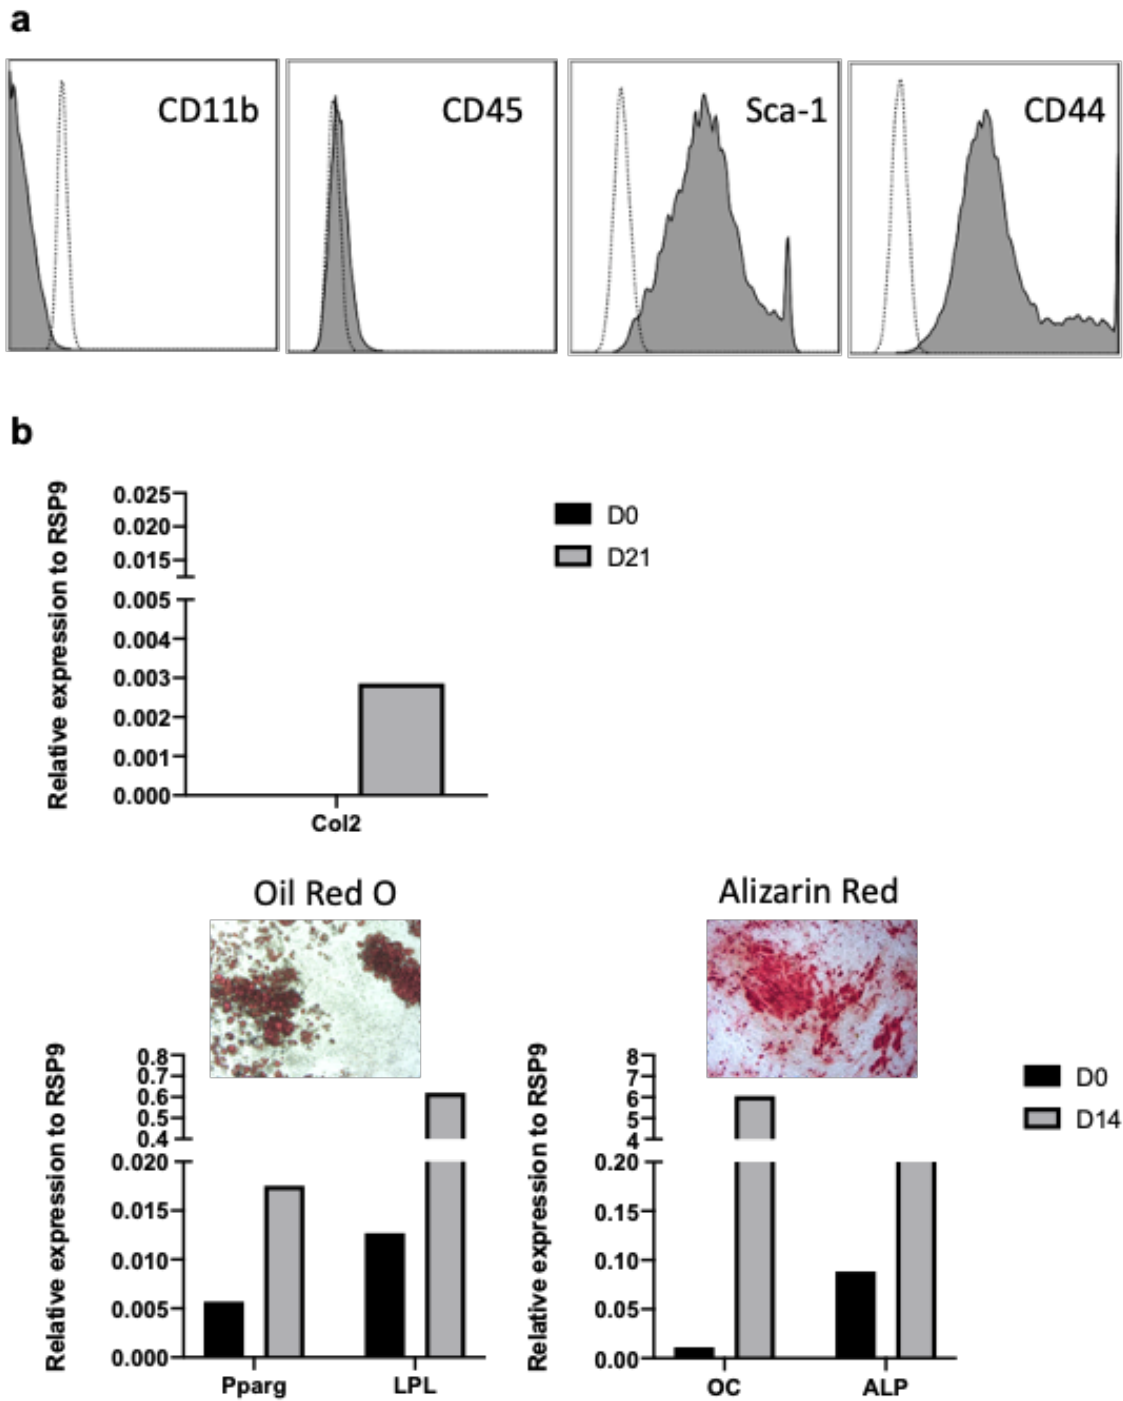

**Supplementary Figure 1.** Characterization of murine MSC derived from the bone marrow of C57BL/6 mice. **a** Phenotype of MSCs was assessed by flow cytometry. Differentiation potential of MSC. **b** The chondrogenic differentiation of MSC was assessed by

RT-qPCR to measure the relative expression of *collagen type II (Col2)* a marker characteristic of chondrocytes. The adipogenic potential of MSC was evaluated by RT-qPCR to measure the relative expression of *lpl* and *ppar $\gamma$* , markers characteristic of adipocytes, and by the visualization of lipid droplets by phase contrast microscopy at day 14 of the differentiation process. Finally, the osteogenic differentiation potential of MSC was evaluated by RT-qPCR to measure the relative expression of *osteocalcin (oc)* and *alkaline phosphatase (alp)*, markers characteristic of osteoblasts, and by Alizarin Red S positive staining.

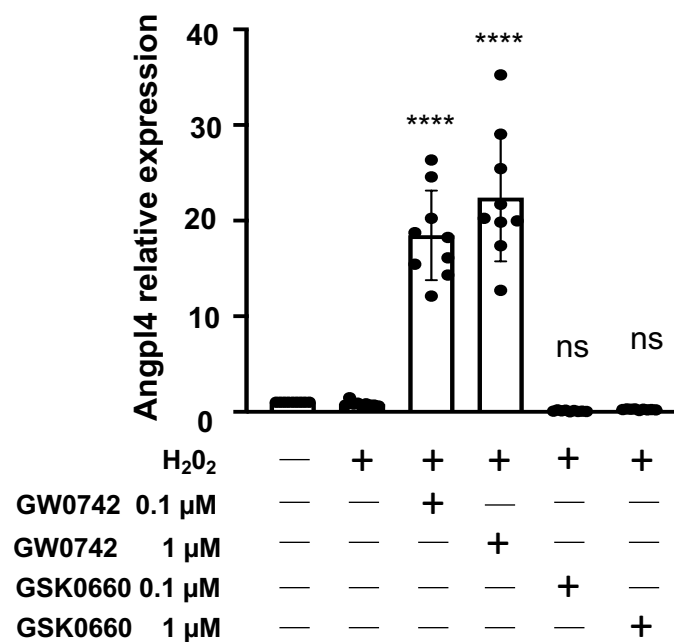

**Supplementary Figure 2:**

Agonist functionality of GW0742 on PPAR $\beta/\delta$  was assessed by RT-qPCR to measure the relative expression of the *Angpl4 target gene*. mRNA expression levels in untreated or preconditioned MSC exposed to H<sub>2</sub>O<sub>2</sub> (250 μM) were assessed by RT-qPCR. Data (mean  $\pm$  SD; n=9 for each group) normalized to the control values (data obtained for MSC without H<sub>2</sub>O<sub>2</sub>)

were compared using ANOVA and the Tukey's post hoc test (normality test passed). P values vs MSC/H<sub>2</sub>O<sub>2</sub> were noted in **(A)**: \*\*\*\* for p<0.0001 and ns for p>0.999 and in **(B)**: \*\*\* for p=0.0001, \*\* for p=0.0046, \* for p=0.0140 and ns for p=0.1006.
